# Supplementary material for: DySCo: Quantitating Associations of Membrane Proteins Using Two-Color Single-Molecule Tracking
Source: PubMed Central journal article supplement — Biophys J. 2009 Aug 19;97(4):L5–7. doi: 10.1016/j.bpj.2009.05.046 (PMC2726305; doi:10.1016/j.bpj.2009.05.046), 2009-08-19
Supplement: mmc1.pdf [file mmc1.pdf]

Biophysical Journal, Volume 97

**Supporting Material**

**DySCo: Quantitating associations of membrane proteins using two-color single-molecule tracking**

Paul D Dunne, Ricardo A Fernandes, James McColl, Ji Won Yoon, John R James, Simon J Davis, and David Klenerman

## Supporting information:

# DySCo: Quantitating associations of membrane proteins using two-color single-molecule tracking

Paul D Dunne,<sup>†||</sup> Ricardo A Fernandes,<sup>†||</sup> James McColl,<sup>†||</sup> Ji Won Yoon,<sup>§</sup> John R James,<sup>††</sup> Simon J Davis,<sup>\*‡</sup> David Klenerman<sup>\*†</sup>

<sup>†</sup>Department of Chemistry, University of Cambridge, Lensfield Road, Cambridge CB2 1EW, UK; <sup>‡</sup>Nuffield Department of Clinical Medicine and Medical Research Council Human Immunology Unit and The Weatherall Institute of Molecular Medicine, University of Oxford, John Radcliffe Hospital, Headington, Oxford OX3 9DS, UK; <sup>§</sup>Department of Engineering Science, University of Oxford, Parks Road, Oxford, OX1 3PJ, UK; <sup>††</sup>Present address: Department of Cellular and Molecular Pharmacology, University of California at San Francisco, San Francisco, CA 94158. <sup>||</sup>These authors contributed equally to this work.

\*Correspondence to: David Klenerman, e-mail: dk10012@cam.ac.uk or Simon Davis, email: simon.davis@ndm.ox.ac.uk

## SUPPORTING MATERIALS AND METHODS

- Vector Constructs
- Cell Culture and Lentivirus Infections
- Latrunculin Treatment of Cells
- Sample Preparation for Microscopy
- TIRFM Experimental Setup
- Bayesian Tracking Approach
- MSD Calculation and Positional Accuracy
- Colocalization Distance Criterion
- Calculation of % Coincidence

## SUPPORTING RESULTS

- Protein Expression at the Cell Surface
- Triggering Assay
- Diffusion Coefficients

## SUPPORTING DISCUSSION

- Fluorophore Stability

## **SUPPORTING MATERIALS AND METHODS**

### **Vector Constructs**

The sequences of all genes were amplified using PCR from cDNA, IMAGE sequences or previously cloned vectors. For CD28, CD86 and TCR $\beta$  the stop codons were mutated for an appropriate restriction enzyme and the genes then inserted, in frame at the N-Terminus of 3x Citrine or 3x mCherry proteins. All genes were sequenced to confirm both the reading frame and integrity. We modified the SFFV promoter on the pHR lentiviral vector (kindly provided by Yasuhiro Ikeda, Mary Collins lab, UCL) to an ecdysone-inducible promoter, producing the pHR Inducible vector, pHRI. In the absence of ecdysone or any other analogue the genes encoded on pHRI vector are transcribed at low levels.

### **Cell Culture and Lentivirus Infections**

Lentivirus infections were used to generate stably transfected cell lines expressing the desired genes. HEK293T cells, grown in DMEM supplemented with 10% FCS, 1% HEPES buffer, 1% sodium pyruvate and 1% antibiotics, were plated in six well plates,  $6 \times 10^5$  cells/plate (all reagents from Sigma Aldrich, Dorset, UK). After 24 hours cells were transfected with equal amounts of pHRI vector (including the gene of interest), p8.91 and pMDG (kindly provided by Yasuhiro Ikeda, Mary Collins lab, UCL) using Genejuice (Novagen Merck, Hull, UK) (1). 48 hours later the supernatant from two six well plates was removed and added to  $1 \times 10^6$  Jurkat (for CD86) or J.RT3 cells (for CD28 and TCR $\beta$  since these are CD28<sup>-</sup> and TCR $\beta$ ). These cells were grown in phenol red free RPMI supplemented with 10% FCS, 1% HEPES buffer, 1% sodium pyruvate and 1% antibiotics. Cells were analysed using FACS after 5 days of lentiviral infection to confirm expression of the desired proteins.

### **Latrunculin Treatment of Cells**

Latrunculin B (Biomol International, Exeter, UK) was dissolved in dimethyl sulfoxide (DMSO from Alfa Aesar, Heysham, UK) to a concentration of 2.5 mM. Cells were incubated at 37°C in supplemented RPMI media containing 2.5  $\mu$ M latrunculin B for 20 minutes to disrupt actin formation. Following re-suspension in phosphate buffered saline (PBS; 150 mM NaCl, 10mM HNaPO<sub>4</sub> (Sigma Aldrich Dorset, UK) in ultrapure water (MilliQ 18.2 M $\Omega$ ), pH 7.2) the cells were imaged using the same protocol as for untreated cells.

### **Sample Preparation for Microscopy**

Microscope coverslips were cleaned for 1 hour in Piranha solution (3:1 sulfuric acid:hydrogen peroxide) and thoroughly rinsed with ultrapure water (MilliQ 18.2 M $\Omega$ ) before incubating with 100  $\mu$ l of 20  $\mu$ g/ml donkey anti-mouse, non-specific IgG antibody (Jackson Immunoresearch Europe, UK) at 37°C for 1 hour. Cells were centrifuged at  $600 \times g$  for 2 minutes and the supernatant removed, before resuspending in 37°C PBS solution for imaging. Slides were rinsed again to remove non-adsorbed antibody and transferred to a heated microscope stage. Cells were added and allowed to settle for 5 minutes and imaged within the subsequent 15 minutes.

## **TIRFM Experimental Setup**

Imaging was performed using total internal reflection fluorescence microscopy (TIRFM), restricting detectable fluorescence signal to within  $\sim 100$  nm from the sample slide (2). Briefly, the output from a dual line Kr/Ar laser operating at 488 and 568 nm (353-LDL-840-240, Melles Griot) was directed down the edge of a 1.45 NA TIRF objective (60x Plan Apo TIRF, NA 1.45, Nikon) mounted on a Nikon TE2000-U microscope. Fluorescence collected by the same objective was separated from the returning TIR beam by a dichroic (490575DBDR, Omega Optical), split into yellow and red components (585 DXLR, Omega Optical, Brattleboro, VT) and filtered using Dual-View<sup>TM</sup> (Optical Insights) mounted filters. The images were simultaneously recorded on an EMCCD (Cascade II: 512 Princeton instruments, MA) whereby the EMCCD was split so that each color was recorded on one half of the EMCCD, operating at minus 70°C. Data were acquired at 17.8 frames s<sup>-1</sup> using IPLab 4.0.2 software (BDBiosciences, Rockville, MD).

The 488 nm beam was attenuated by 64 % using filters (Comar, Cambridge, UK). The laser power used for taking measurements being 1.2 mW for the 568 channel and 0.35 mW for the 488 (as measured by epifluorescence at the sample plane) over an area of  $\sim 45$   $\mu\text{m}$  diameter. Images were taken for 30 frames and data only captured during the first 20 minutes after cells began to attach to the surface.

To achieve good image registration, a grid consisting of regularly spaced ion-beam etched holes in gold-on-glass was utilized. Dual-View<sup>TM</sup> optics were adjusted so as to maximize the overlap between red and green images of the grid under white-light illumination, resulting in measured image registrations in the range of  $\sim 75$  nm.

## **Bayesian Tracking Approach**

Tracking was carried out using custom software implemented in MATLAB (The MathWorks, Natick, MA). The Bayesian based algorithm is an extension of work by Oh *et al* (3) and similar to our published Bayesian method (4).

After detecting centroid positions of potential targets above a user defined threshold (5) (five standard deviations above the image mean pixel count for this work), the program links spots using a Markov Chain Monte Carlo (MCMC) algorithm programmed within a Bayesian framework (for details of Bayesian formulation see Yoon *et al.* (4)). Detected spots are initially linked at random over the entire image sequence and this configuration is assigned a possible likelihood according to its statistical fit to Brownian behavior. The program then iterates the configuration, with several possible outcomes at each iteration:

- Birth (new track is proposed)
- Death (track is removed)
- Split (track splits into smaller tracks)
- Merge (smaller tracks are merged)
- Update (track configuration is altered)
- Increase (track increases in length)
- Decrease (track decreases in length).

With increasing iterations the program approaches the most likely configuration, which may not always give the same result as those from traditional deterministic tracking (as found for our previous algorithm (4)). Very few initial parameters are specified by the user- thus the contribution of error introduced by poor parameter initialization is minimized.

This method differs from our published method (4) in two important ways that decrease the computational complexity significantly. In the initial implementation, particle detection was incorporated into the Bayesian framework, but for the analysis in this work we identify objects as peaks above a user defined threshold, using an established method (5). This means we need not consider every pixel in the image when it comes to the tracking step. The tracking for our previous implementation used a Sequential Monte Carlo (SMC) algorithm, with tracks being updated at each frame based on their previous history. That is to say, after the  $n^{\text{th}}$  frame is processed, the result is inputted into the calculation for the  $(n+1)^{\text{th}}$  frame, and is not considered again. For this paper, tracking is carried out using a MCMC method, whereby the whole video sequence is considered for each iteration. This method has the advantage of being far less sensitive to the initial configuration. Further details will be included in a future publication (6).

The software can be made freely available upon request.

### **MSD Calculation and Positional Accuracy**

We performed mean-square displacement (MSD) calculations on the data and fitted the first three points of the MSD curve to a linear equation,

$$MSD = 4Dt + A_0 \quad (1)$$

where  $D$  is the diffusion coefficient. The median and upper and lower quartiles are chosen to represent the overall distribution of  $D$  and  $A_0$  for this work as the diffusion coefficients and  $A_0$  have skewed distributions.

To estimate the inherent uncertainty,  $\sigma$ , in the assignment of particle positions, we use (7),

$$A_0 = 2\sigma^2. \quad (2)$$

The mean positional accuracy across the six different datasets was found to be  $67.3 \pm 5.4$  nm for the yellow channel, and  $75.8 \pm 3.2$  nm for the red.

### **Colocalization Distance Criterion**

We obtain the colocalization criterion from the root mean-square (RMS) deviations in the positional accuracies for yellow and red molecules using,

$$\sigma_t = (\sigma_{\text{yellow}}^2 + \sigma_{\text{red}}^2)^{1/2}. \quad (3)$$

Using equation 3 with our positional accuracies calculated above gives a value of 101.4 nm. Hence, in order to obtain a 90% probability of colocalization the distance threshold is  $1.65\sigma_t$ , corresponding to 167.3 nm (8). Adding the value for our image registration accuracy (see TIRFM Experimental Setup section above), gives a colocalization distance value of 242.3 nm. For this work we chose the colocalization distance of 300 nm, to minimise the chance of missing associated molecules.

### Calculation of % Coincidence

After tracks were identified, we examined association by applying a nearest-neighbor distance approach (8,9). Distances between red and yellow tracks were calculated for each video frame, and a track determined as associated if it remained within the 300 nm colocalization distance for 3 or more frames. The overall coincidence is taken to be,

$$\%Coincidence = 100 \times \frac{\text{number of colocalized tracks in red channel}}{\text{total number of tracks in red channel}}, \quad (4)$$

with the red channel chosen due to the lower detection efficiency of events. The coincidence is calculated for each video and the overall coincidence for an experiment is taken as the mean across individual files.

To examine the contribution of chance coincidence, we repeated the colocalization analysis for all combinations of non-coupled red and yellow file pairs. The results of this analysis are present in Table S1.

**Table S1: Red : yellow track colocalization.** % coincident tracks for matched and shuffled files were determined for red and yellow tracks which remained within 300nm for at least three frames, errors are SEM. Subscript ‘lat’ denotes cells which were pre-treated with 2.5  $\mu$ M latrunculin, a cytoskeletal disrupting molecule. “Blank” cells are Jurkat cells which do not express any fluorescent protein-tagged molecules.

|                     | Cells | Tracks |     |                                 | Coincidence    |               |
|---------------------|-------|--------|-----|---------------------------------|----------------|---------------|
|                     |       | Yellow | Red | % red tracks relative to yellow | Matched        | Shuffled      |
| CD28                | 25    | 434    | 269 | 62                              | $22.7 \pm 5.9$ | $1.2 \pm 0.3$ |
| CD86                | 27    | 332    | 257 | 77                              | $10.2 \pm 3.0$ | $0.6 \pm 0.1$ |
| TCR                 | 23    | 242    | 177 | 73                              | $4.8 \pm 2.3$  | $0.3 \pm 0.1$ |
| CD28 <sub>lat</sub> | 13    | 126    | 96  | 76                              | $22.6 \pm 7.6$ | $0.7 \pm 0.3$ |
| CD86 <sub>lat</sub> | 16    | 143    | 124 | 87                              | $3.3 \pm 1.5$  | $0.6 \pm 0.2$ |
| TCR <sub>lat</sub>  | 15    | 107    | 92  | 86                              | $2.3 \pm 1.2$  | $0.4 \pm 0.2$ |
| Blank cells         | 15    | 23     | 21  | 91                              | $3.3 \pm 3.2$  | -             |

To test how the distance threshold affected our results, the analysis was carried out at a range of distances, with the same overall trend observed above 200 nm (Figure S1). It seems that the detected coincidence observed for molecules remaining colocalized for 3 or more frames at a distance threshold of 100 nm is negligible, which is not surprising since this is a comparable length-scale to our positional accuracy in each color channel.

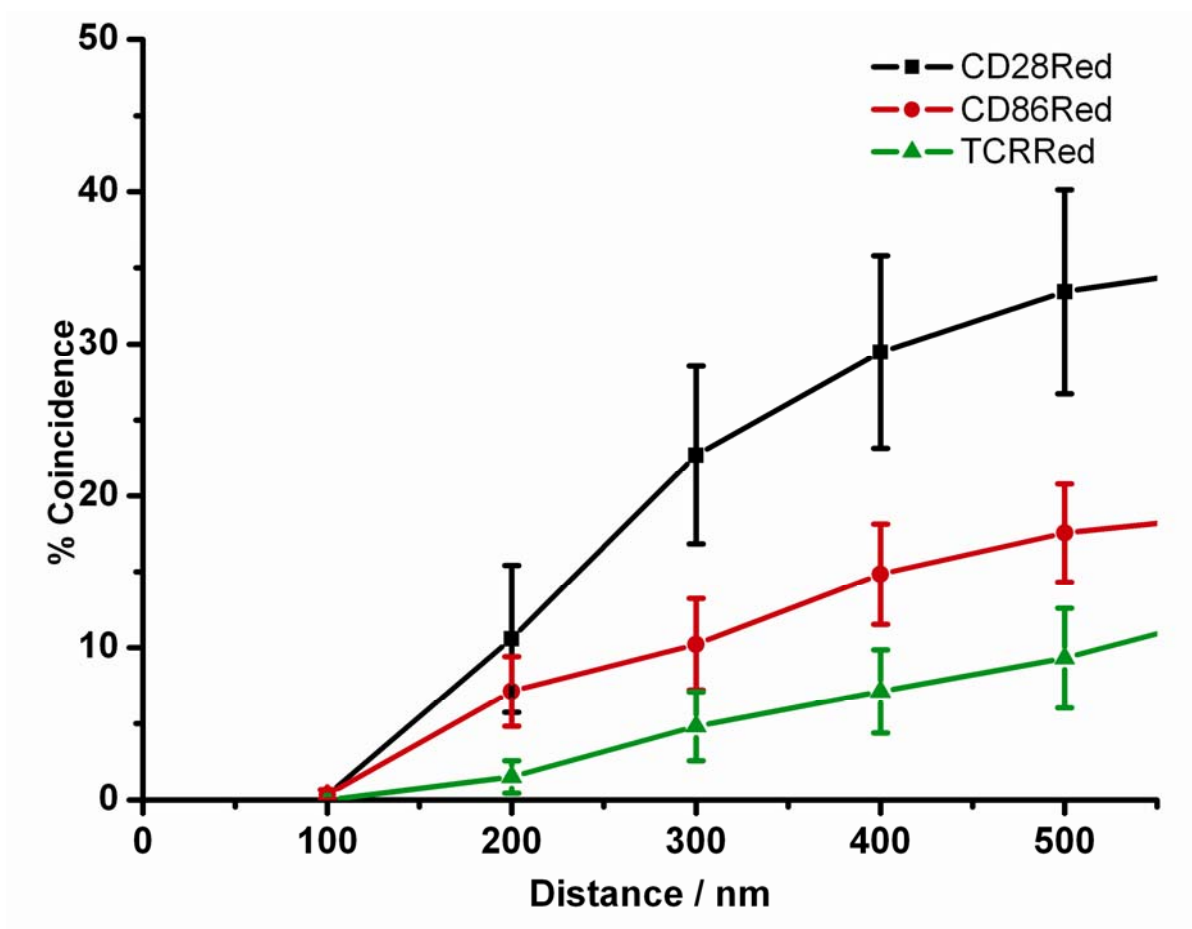

**Figure S1: Coincidence dependence on varying distance (100-500 nm). Red and yellow coincidences were calculated at each distance. From this data we conclude that the observed behavior is not specific to a 300 nm colocalization distance. Errors are S.E.M.**

## SUPPORTING RESULTS

### Protein Expression at the Cell Surface

Protein expression levels were quantitated using FACS in conjunction with QuantiBrite PE beads (Becton Dickinson, Oxford, United Kingdom), labeled with known levels of fluorescent R-phycoerythrin (PE) to calibrate the measured fluorescence of cell-bound PE-labeled antibodies to antigen density, as described in our previous work (10). The fluorescence values of the Quantibrite PE beads were acquired on a Cyan ADP flow cytometer in the FL2 channel, which were then used to construct a calibration curve that linearly related the number of PE molecules to the level of fluorescence. J.RT3 CD86<sub>3xCitrine</sub> and J.RT3 CD28<sub>3xCitrine</sub> (Citrine and mCherry kindly provided by Roger Y. Tsien) cells were incubated with either anti-CD86 (BU63) or anti-CD28 (7.3B6) PE-conjugated antibodies at 100 µg/ml for 60 min on ice. This ensured saturation of antigen sites and predominantly monovalent antibody binding. The measured PE fluorescence was then converted to the number of PE molecules per cell. Assuming univalent binding and 1:1 antibody:PE labelling (which is invariably the case) the number of PE molecules can be equated to antigen density. For the molecules in this study, the values are presented below (Table S2):

**Table S2: Number of proteins on the T-cell surface**

|                                | Jurkat | J.RT3 |
|--------------------------------|--------|-------|
| Wild type                      | 260    | 257   |
| Isotype Control                | 438    | 256   |
| J.RT3 CD86 <sub>3citrine</sub> | 2109   | -     |
| J.RT3 CD28 <sub>3citrine</sub> | -      | 3467  |

### Triggering Assay

To ensure that the presence of tandem cytocellular fluorescent proteins did not interfere with TCR function, we tested triggering using a modified NFAT assay (11). Briefly, following TCR signalling, Nuclear factor of activated T-cell (NFAT) transcription factors translocate from the cytosol to the nucleus. Here they initiate transcription of genes regulated by the NFAT promoter. T-cells were engineered to include a gene encoding *Renilla Luciferase* downstream of the NFAT promoter. Hence the level of cell activation could be probed by measuring *Renilla Luciferase* bioluminescence after adding coelenterazine h (Lux Biotechnology, Edinburgh, UK).

As expected, our TCRβ<sup>-</sup> J.RT3 control cells showed an OKT3/OX7 ratio very close to 1, indicating zero activation (Figure S2). With expression of TCRβ<sub>TM</sub> (native protein, no mCherry or Citrine) there was an increase in OKT3/OX7 and this was maintained for TCR<sub>3xCitrine</sub> and TCR<sub>3xmCherry</sub>. The values are low and this is to be expected as we used the pHRI vector. Increasing the levels of TCR by expressing the protein using a pHR vector gave



an increase in the overall magnitude of the activation level, whilst the trend remained the same. As a comparison, Jurkats expressing around 10000 CD3 $\epsilon$  on their surface were found to give an OKT3/OX7 ratio of 2.13, therefore the values for the pHRI cells suggest a good level of stimulation.

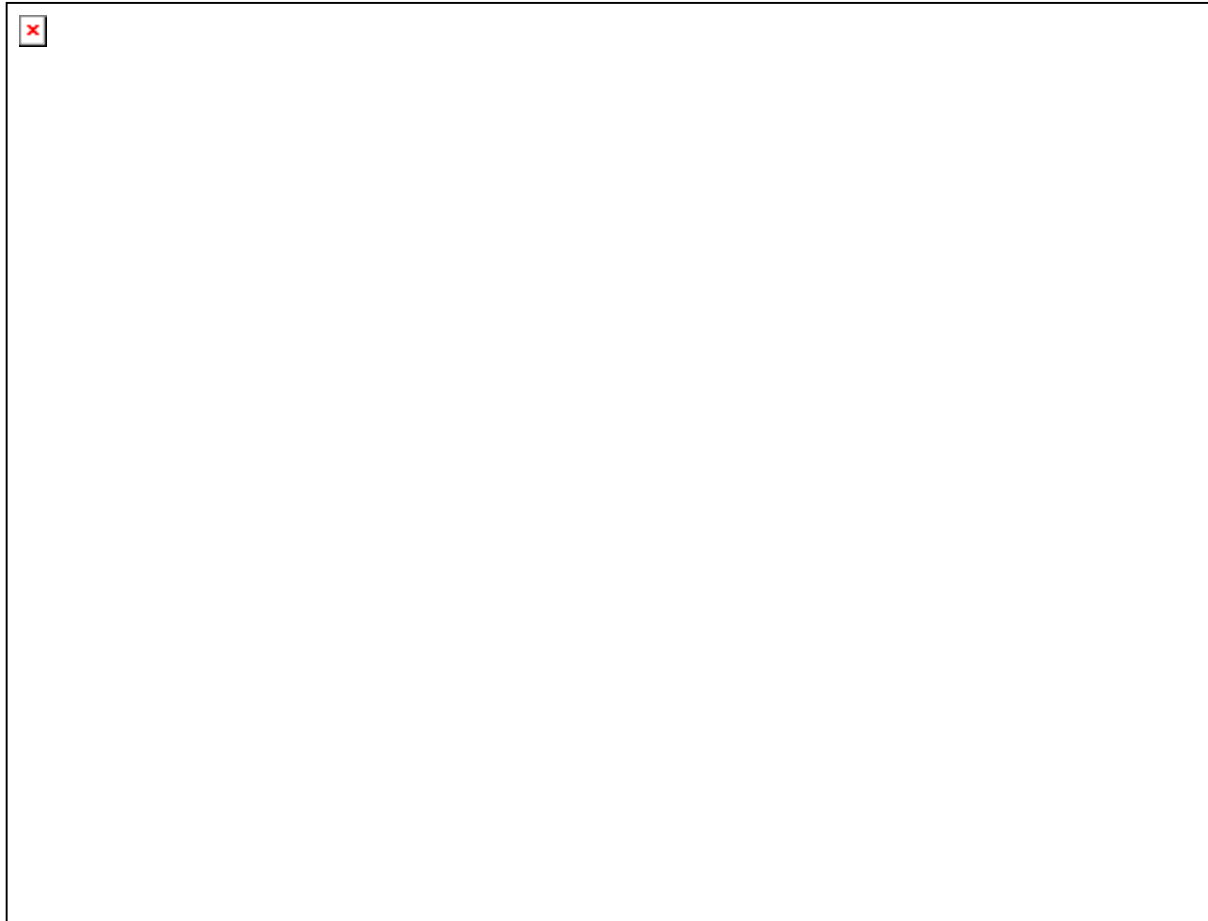

**Figure S2: Triggering levels.**  $1 \times 10^5$  cells were incubated for 6 hours with either the triggering anti-CD3 $\epsilon$  (OKT3) or non-triggering anti-Thy1 (OX7) soluble antibodies at 5  $\mu\text{g/ml}$ . Bioluminescence was measured upon addition of 1  $\mu\text{g/ml}$  coelenterazine and the data represented as a ratio of Renilla Luciferase activity in response to OKT3 and OX7 antibodies. Solid bar is result for wild type Jurkat cells and line-filled bars are for J.RT3 cells.

### **Diffusion Coefficients**

Diffusion coefficients recovered were similar to those obtained by Fluorescence Correlation Spectroscopy (FCS) in a previous study (10) (Table S4), although the cell line and proteins differ slightly between these studies (Table S3). From this data it is clear that treating the cells with latrunculin leads to an increase in the rate of diffusion for CD86 and TCR, but decreases the median rate of diffusion for CD28. In conjunction with the colocalization measurements presented in Table S2, these data show that the behavior of TCR and CD86 upon latrunculin treatment differ to that observed for CD28, perhaps suggesting differences in the organization of these molecules at the cell surface.

**Table S3: Diffusion coefficients for transgenically labeled proteins**

|                       |        | Median ( $\mu\text{m}^2\text{s}^{-1}$ ) | Upper Quartile ( $\mu\text{m}^2\text{s}^{-1}$ ) | Lower Quartile ( $\mu\text{m}^2\text{s}^{-1}$ ) | Number of tracks |
|-----------------------|--------|-----------------------------------------|-------------------------------------------------|-------------------------------------------------|------------------|
| CD28                  | Yellow | 0.117                                   | 0.285                                           | 0.033                                           | 457              |
|                       | Red    | 0.102                                   | 0.268                                           | 0.021                                           | 278              |
| CD86                  | Yellow | 0.073                                   | 0.225                                           | 0.017                                           | 328              |
|                       | Red    | 0.109                                   | 0.323                                           | 0.017                                           | 267              |
| TCR                   | Yellow | 0.078                                   | 0.240                                           | 0.025                                           | 231              |
|                       | Red    | 0.093                                   | 0.311                                           | 0.004                                           | 181              |
| CD28 <sub>lat</sub> * | Yellow | 0.097                                   | 0.229                                           | 0.024                                           | 121              |
|                       | Red    | 0.053                                   | 0.207                                           | 0.008                                           | 89               |
| CD86 <sub>lat</sub> * | Yellow | 0.122                                   | 0.306                                           | 0.028                                           | 143              |
|                       | Red    | 0.200                                   | 0.622                                           | 0.049                                           | 124              |
| TCR <sub>lat</sub> *  | Yellow | 0.143                                   | 0.605                                           | 0.020                                           | 107              |
|                       | Red    | 0.164                                   | 0.351                                           | 0.062                                           | 92               |

\*Subscript 'lat' denotes cells which were pre-treated with 2.5  $\mu\text{M}$  latrunculin.

**Table S4: Protein diffusion coefficients from FCS.** Diffusion coefficients for Fab labeled molecules on DO11.10 (murine) T cells from James *et al* are shown for ease of comparison.

|      |       | Diffusion Coefficients from FCS |
|------|-------|---------------------------------|
| CD28 | Green | $0.088 \pm 0.001$               |
|      | Red   | $0.086 \pm 0.002$               |
| CD86 | Green | $0.146 \pm 0.002$               |
|      | Red   | $0.121 \pm 0.003$               |
| TCR  | Green | $0.089 \pm 0.001$               |
|      | Red   | $0.092 \pm 0.001$               |

## SUPPORTING DISCUSSION

### Fluorophore Stability

We note that when compared with Citrine only 70 to 80% of the mCherry tracks were visible (Table S2). Red fluorescent proteins have often been found to have inferior photophysical properties relative to shorter wavelength variants, with recent studies showing complex photophysics (12) and multiple brightness states (13) for mCherry. In addition, a study by Maeder *et al.* using 3xmCherry-tagged molecules in yeast cytoplasm showed that only 50 % of the mCherry molecules in their sample were fluorescent during the course of a measurement (14). This was attributed to the slower maturation time of mCherry, and therefore would be different for our study since the protein turnover rate vs. fluorescent protein maturation rate will be different for receptors in the cell membrane relative to molecules in yeast cytoplasm.

### References

1. Naldini, L., U. Blomer, P. Gallay, D. Ory, R. Mulligan *et al.* 1996. In vivo gene delivery and stable transduction of nondividing cells by a lentiviral vector. *Science* 272:263-267.
2. Axelrod, D. 2008. Total Internal Reflection Fluorescence Microscopy. In *Biophysical Tools for Biologists, Vol 2: in Vivo Techniques*. Elsevier Academic Press Inc. San Diego. 169-221.
3. Oh, S., L. Schenato, P. Chen, and S. Sastry. 2007. Tracking and coordination of multiple agents using sensor networks: System design, algorithms and experiments. *Proceedings of the Ieee* 95:234-254.
4. Yoon, J. W., A. Bruckbauer, W. J. Fitzgerald, and D. Klenerman. 2008. Bayesian inference for improved single Molecule fluorescence tracking. *Biophysical Journal* 94:4932-4947.
5. Crocker, J. C. and D. G. Grier. 1996. Methods of digital video microscopy for colloidal studies. *Journal of Colloid and Interface Science* 179:298-310.
6. Yoon, J. W. and S. S. Singh. (*in preparation*).
7. Bruckbauer, A., P. James, D. J. Zhou, J. W. Yoon, D. Excell *et al.* 2007. Nanopipette delivery of individual molecules to cellular compartments for single-molecule fluorescence tracking. *Biophysical Journal* 93:3120-3131.
8. Koyama-Honda, I., K. Ritchie, T. Fujiwara, R. Iino, H. Murakoshi *et al.* 2005. Fluorescence imaging for monitoring the colocalization of two single molecules in living cells. *Biophysical Journal* 88:2126-2136.
9. Lachmanovich, E., D. E. Shvartsman, Y. Malka, C. Botvin, Y. I. Henis *et al.* 2003. Co-localization analysis of complex formation among membrane proteins by computerized fluorescence microscopy: application to immunofluorescence co-patching studies. *Journal of Microscopy-Oxford* 212:122-131.
10. James, J. R., S. S. White, R. W. Clarke, A. M. Johansen, P. D. Dunne *et al.* 2007. Single-molecule level analysis of the subunit composition of the T cell receptor on live T cells. *Proceedings of the National Academy of Sciences of the United States of America* 104:17662-17667.
11. Durand, D. B., J. P. Shaw, M. R. Bush, R. E. Replogle, R. Belagaje *et al.* 1988. Characterization of Antigen Receptor Response Elements within the Interleukin-2 Enhancer. *Molecular and Cellular Biology* 8:1715-1724.
12. Hendrix, J., C. Flors, P. Dedecker, J. Hofkens, and Y. Engelborghs. 2008. Dark states in monomeric red fluorescent proteins studied by fluorescence correlation and single molecule spectroscopy. *Biophysical Journal* 94:4103-4113.
13. Wu, B., Y. Chen, and J. D. Muller. 2009. Fluorescence fluctuation spectroscopy of mCherry in living cells. *Biophys J* 96:2391-2404.
14. Maeder, C. I., M. A. Hink, A. Kinkhabwala, R. Mayr, P. I. H. Bastiaens *et al.* 2007. Spatial regulation of Fus3 MAP kinase activity through a reaction-diffusion mechanism in yeast pheromone signalling. *Nature Cell Biology* 9:1319-U1226.

**Video S1: TCR<sub>3xCitrine</sub> (*right*) and TCR<sub>3x mCherry</sub> (*left*) raw images on J.RT3 cells. Scalebar is 2  $\mu\text{m}$ .**

**Video S2: Tracked CD86<sub>3xCitrine</sub> (blue circles) and CD86<sub>3x mCherry</sub> (red circles) molecules on the surface of Jurkat cells overlaid on the Citrine channel background. Scalebar is 2  $\mu\text{m}$ .**

**Video S3: Tracked CD28<sub>3xCitrine</sub> (blue circles) and CD28<sub>3xmCherry</sub> (red circles) molecules on the surface of J.RT3 cells overlaid on the Citrine channel background. Scalebar is 2  $\mu\text{m}$ .**

**Video S4: Tracked TCR<sub>3xCitrine</sub> (blue circles) and TCR<sub>3xmCherry</sub> (red circles) molecules on the surface of J.RT3 cells overlaid on the Citrine channel background. Scalebar is 2  $\mu\text{m}$ .**
